# Supplementary material
Source: PubMed Central journal article supplement (PMC3845150)
Supplement: 1319583110_pnas.201319583SI.pdf [file 1319583110_pnas.201319583SI.pdf]

# Supporting Information

Davare et al. 10.1073/pnas.1319583110

## SI Methods

**In Vivo Inhibitor Treatment of Tumor-Bearing Mice.** All animal experiments were performed in accordance with a protocol approved by the Memorial Sloan-Kettering Institutional Animal Care and Use Committee. Foretinib was dissolved in DMSO, aliquoted, and stored at  $-80^{\circ}\text{C}$ . Before use, aliquots were further diluted in 1% hydroxypropylmethylcellulose/0.2% SDS. Crizotinib was reconstituted in 1% hydroxypropylmethylcellulose/0.2% SDS, aliquoted, and stored at  $-80^{\circ}\text{C}$ . Tumor cell lines expressing either the FIG-ROS kinase fusion or shRNA against murine phosphatase and tensin homolog (Pten) were s.c. injected into 11-wk-old female immunodeficient Crl:Nu-Foxn1<sup>tmu</sup> mice weighing 26 g. Upon reaching a tumor diameter of 4–6 mm, mice were treated with foretinib (25 mg/kg; molecular weight = 632.65), crizotinib (25 mg/kg; molecular weight = 450.34), or vehicle control by oral gavage once daily for 9 consecutive days. Caliper measurements were taken at the time of treatment initiation ( $T_0$ ) and at 24 h after administration of the last dose ( $T_{\text{end}}$ ). Data in the waterfall plots are calculated as follows:  $((\text{tumor volume } T_{\text{end}} / \text{tumor volume } T_0) - 1)$ . Tumor volume is calculated as:  $0.5 \times L \times W^2$  with  $L > W$ .

**Isolation of Primary Liver Progenitor Cells and Tumor Cell Line Generation.** A detailed description of the production and characterization of cholangiocarcinomas from these cells are described in the companion paper in PNAS (1). Isolation of liver progenitor cells was performed as previously described (2). Briefly, to produce tumors, hepatoblasts of the genotype AlbCre<sup>+/-</sup>; lsl Kras<sup>G12D+/-</sup>; p53<sup>R172H/loxP</sup> were isolated from embryonic day (ED) 14.5 mouse embryos and retrovirally transduced with either the FIG-ROS fusion or a potent short hairpin RNA against Pten (shPten.1522). At 48 h post transduction,  $1 \times 10^6$  cells were resuspended in 25  $\mu\text{L}$  Matrigel (BD) and injected subcapsular into the livers of immunodeficient (Crl: Nu-Foxn1<sup>tmu</sup>) nude mice. Upon tumor formation, tumors were explanted and subjected to collagenase digestion (Sigma; C1538). Crude digests were plated onto gelatin-coated plates. Enrichment of tumor cells was enhanced by differential trypsinization or cell sorting. These murine cholangiocarcinoma tumor-derived cell lines expressing FIG-ROS (lines 3 and 4) and shPten (lines 1 and 2) were further cultured and maintained in DMEM-high glucose medium (Invitrogen) supplemented with 10% FCS (Invitrogen), L-glutamine (Invitrogen), and penicillin/streptomycin (Invitrogen).

**Plasmid Construction.** The FIG-ROS-S fusion gene was synthesized using the GeneArt service (Invitrogen). FIG-ROS-S is denoted as FIG-ROS here. FIG-ROS was further subcloned into the retroviral vector, pMSCV-IRES-GFP (pMIG) using the Gateway Cloning system (Invitrogen). SLC-ROS-S (SLC-ROS)

was cloned from cDNA made from the non-small cell lung cancer cell line, HCC78. Briefly, using sense primers that were SLC34A2 N-terminus specific (5' CAC CAT GGC TCC CTG GCC TGA ATT GG) and anti-sense primers that are ROS1-specific (5' TTA ATC AGA CCC ATC TCC ATA TCC ACT GTG AGT G), we were able to amplify both SLC-ROS-L and SLC-ROS-S from HCC78 cDNA. We individually cloned SLC-ROS-L and SLC-ROS-S after gel extraction of the PCR products into the Gateway Cloning system compatible entry vector pENTR-D/TOPO (Invitrogen) and further subcloned into the pMIG retroviral vector as described above. The FIG-ROS point mutations were created using the Quikchange site-directed mutagenesis kit (Agilent Technologies) according to the manufacturer's protocol.

**IL-3 Withdrawal/Transformation Assays.** Parental Ba/F3, pMIG-alone, FIG-ROS (wild-type or ROS1 KD mutant variants) or SLC-ROS-expressing Ba/F3 cells ( $3 \times 10^6$  cells total) were washed three times with 50 mL of RPMI-10% FBS media and resuspended in a new 6 mL of RPMI-10% FBS media. The total number of viable cells was counted every other day using Guava ViaCount reagent and a Guava Personal Cell Analysis flow cytometer (Guava Technologies). If cells grew to cell densities  $>1.5 \times 10^6/\text{mL}$  in withdrawal media, the cells were centrifuged and resuspended in fresh media to keep a final culture density of  $0.5 \times 10^6/\text{mL}$ .

**Immunoblotting.** Ba/F3 FIG-ROS, SLC-ROS, HCC78, and murine cholangiocarcinoma cell lines were treated with the indicated concentrations of inhibitors for 1–2 h. In the case of Ba/F3 cells, after treatment  $5 \times 10^6$  cells were pelleted, washed once in ice-cold PBS, and lysed in 200  $\mu\text{L}$  of cell lysis buffer (Cell Signaling Technology) supplemented with 0.25% deoxycholate, 0.05% SDS, and protease and phosphatase inhibitors. After protein quantification, equal amounts of protein containing lysate were either used for immunoprecipitation where indicated or extracted with SDS sample buffer for 15 min at  $80^{\circ}\text{C}$ . Proteins were transferred to Immobilon-FL membranes (Millipore) and subjected to immunoblot analysis with antibodies specific for phospho-ROS1 [Cell Signaling Technology (CST); 3078], total ROS1 (CST; 3266), phospho-SHP2 (CST; 3751), total SHP2 (CST; 3752), phospho-STAT3 (CST; 9145), total STAT3 (CST; 4904), phospho-ERK1/2 (CST; 9101), total ERK2 (Santa Cruz; sc-1647), phospho-S6 (CST; 4858), total S6 (CST; 2216), phospho-SRC (CST; 2105), total SRC (CST; 2110),  $\alpha$ -tubulin (Sigma; T6199), and  $\beta$ -actin (Sigma; A1978). We used the LI-COR Odyssey imaging system or the Bio-Rad Chemidoc imaging station and followed the manufacturer's protocol for immunoblot detection with use of IR dye or HRP-conjugated secondary antibodies, respectively.

1. Saborowski A, et al. (2013) Mouse model of intrahepatic cholangiocarcinoma validates FIG-ROS as a potent fusion oncogene and therapeutic target. *Proc Natl Acad Sci USA*, 10.1073/pnas.1311707110.

2. Zender L, et al. (2005) Generation and analysis of genetically defined liver carcinomas derived from bipotential liver progenitors. *Cold Spring Harb Symp Quant Biol* 70: 251–261.



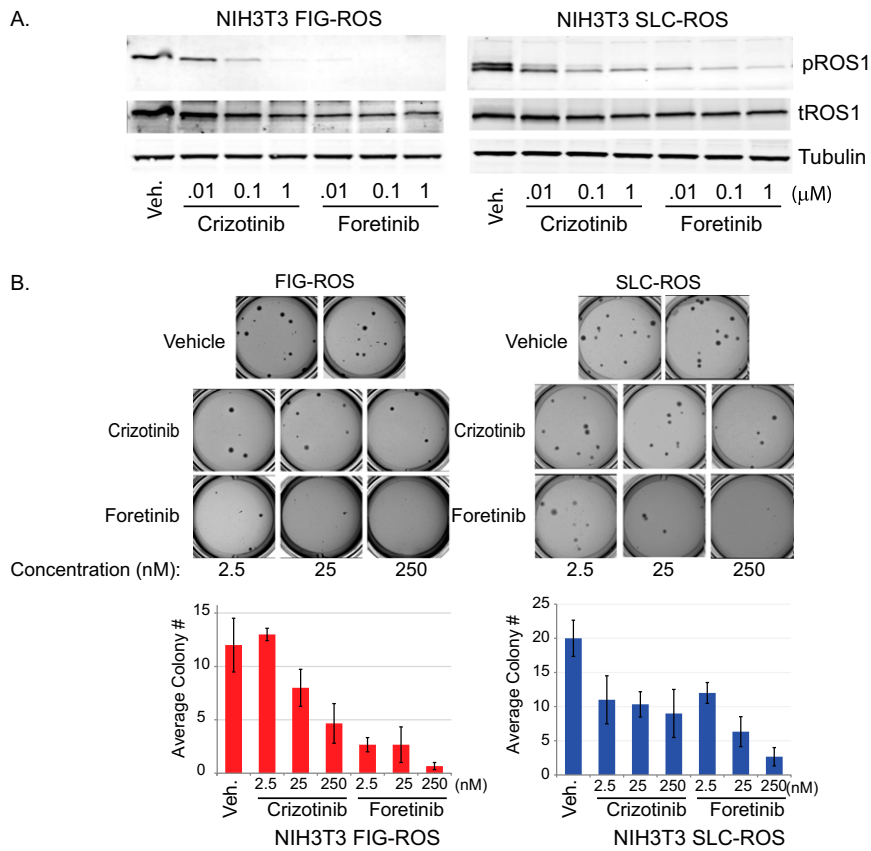

**Fig. S2.** Foretinib and crizotinib suppress ROS1 fusion phosphorylation and diminish anchorage-independent colony formation in transformed NIH 3T3 cells. (A) Immunoblot analysis of ROS1 fusion phosphorylation from NIH 3T3 FIG-ROS and SLC-ROS cells treated with varying concentrations of crizotinib and foretinib for 1 h. (B, Upper) Representative images of NIH 3T3 FIG-ROS and SLC-ROS colony formation in soft agar with and without varying dose of crizotinib and foretinib. (Lower) Quantification of colony number formed from vehicle or inhibitor-treated NIH 3T3 FIG-ROS and SLC-ROS cells. Graph shows average colony number  $\pm$  SEM from four independent wells.





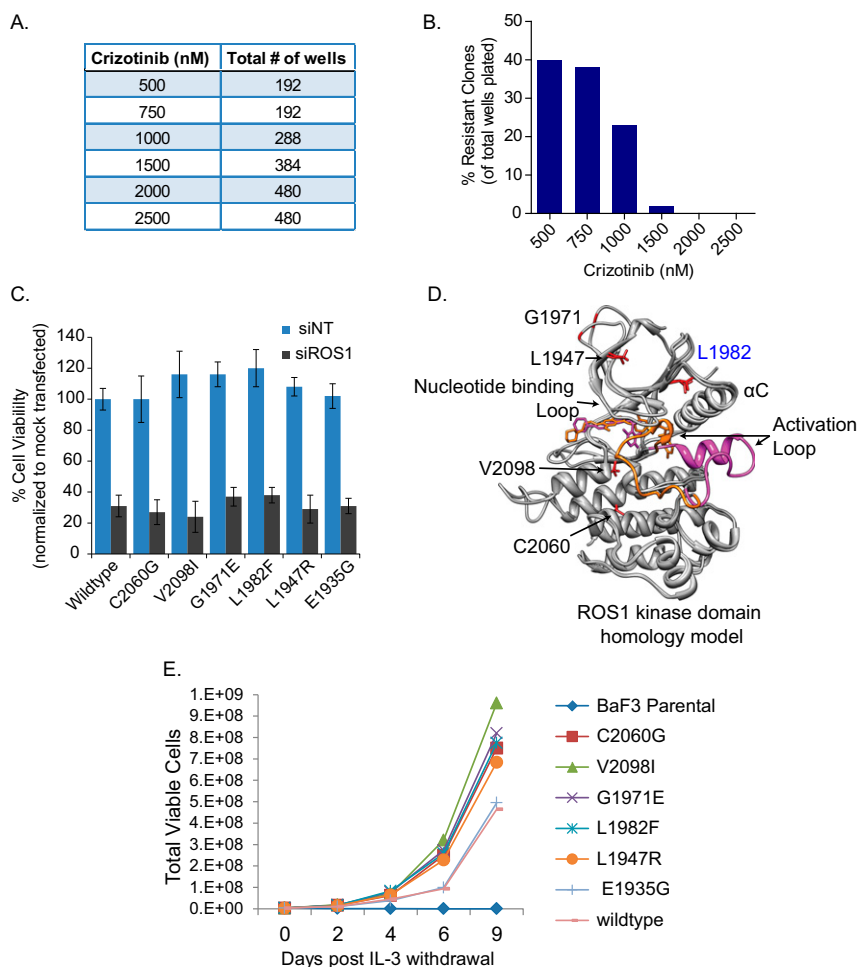

**Fig. S5.** Recovered Ba/F3 FIG-ROS crizotinib-resistant clones remain dependent on FIG-ROS and are independently transforming in Ba/F3 cells. (A) Table shows the number of wells of 96-well plates surveyed with 500; 750; 1,000; 1,500; 2,000; and 2,500 nM crizotinib after ENU-induced mutagenesis. (B) Number of wells with crizotinib-resistant clones for each concentration that were recovered, expressed as a percentage of the total number of wells seeded. (C) Viability of Ba/F3 FIG-ROS mutant cell lines recovered from ENU-mutagenesis screen after electroporation with siRNA for ROS1 kinase domain (siROS1) and nontargeting (siNT). Viability of siNT and siROS1-transfected cells was normalized to mock (sterile water)-transfected cells. (D) Homology model of ROS1 kinase domain bound to crizotinib (magenta) and foretinib (orange). The ligands are shown in colored stick representation, whereas the protein is shown in gray ribbon. Differences in the activation loop conformations are highlighted by coloring according to the respective ligands. Residues that were found to confer resistance to crizotinib when mutated are highlighted in red and shown as stick representations. (E) IL-3 withdrawal assay for Ba/F3 cells transfected with wild-type or indicated mutant FIG-ROS. Total viable cell number was determined by counting cells on days 2, 4, 6, and 9 after IL-3 withdrawal.



## Other Supporting Information Files

**Dataset S1.** List of inhibitors, 384-well plate layout, and the normalized FIG-ROS cell viability data for all of the inhibitors tested in the high-throughput inhibitor platform

[Dataset S1](#)

**Dataset S2.** In vitro binding affinities ( $K_d$ ) of a subset of kinase inhibitors for ROS1, ALK, MET, EGFR, PDGFRA, and/or IGF1R as previously reported

[Dataset S2](#)
